# Supplementary material
Source: PubMed Central journal article supplement (PMC3357991)
Supplement: cr2011176x1.pdf [file cr2011176x1.pdf]

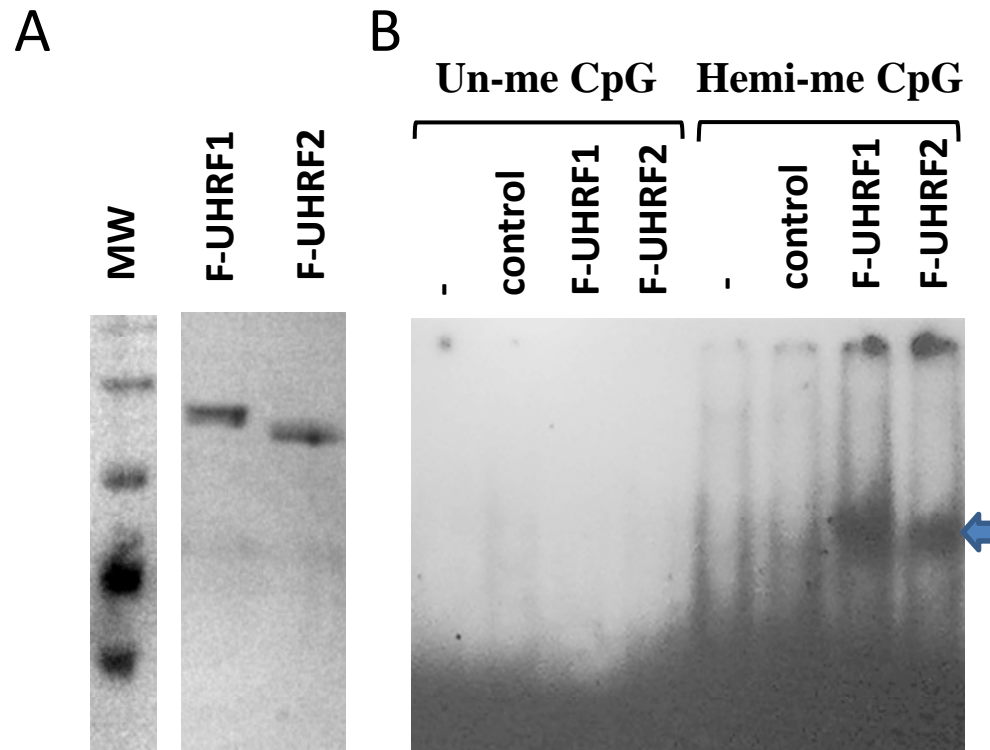

**Supplementary Fig. 1.** Full-length UHRF1 and UHRF2 bind preferentially hemi-methylated DNA. **A)** Coomassie blue staining showing affinity-purified Flag-tagged UHRF1 and UHRF2. Both Flag-UHRF1 and Flag-UHRF2 were expressed in 293T cells via transient transfection. Two days after transfection the whole cell extracts were prepared and subjected to immuno-affinity purification of Flag-UHRF1 and Flag-UHRF2 via anti-Flag M2 beads. **B)** Gel mobility shift assay showing binding of Flag-UHRF1 and Flag-UHRF2 to hemi-methylated but not un-methylated DNA probes. “-” and “control” represents the gel shift reactions with immuno-affinity purified materials from untransfected cells and cells transfected with empty expression vector pSG5-Flag respectively. The resulting specific DNA-protein complex were indicated by arrow.
