# Supplementary material
Source: PubMed Central journal article supplement (PMC3357991)
Supplement: cr2011176x2.pdf [file cr2011176x2.pdf]

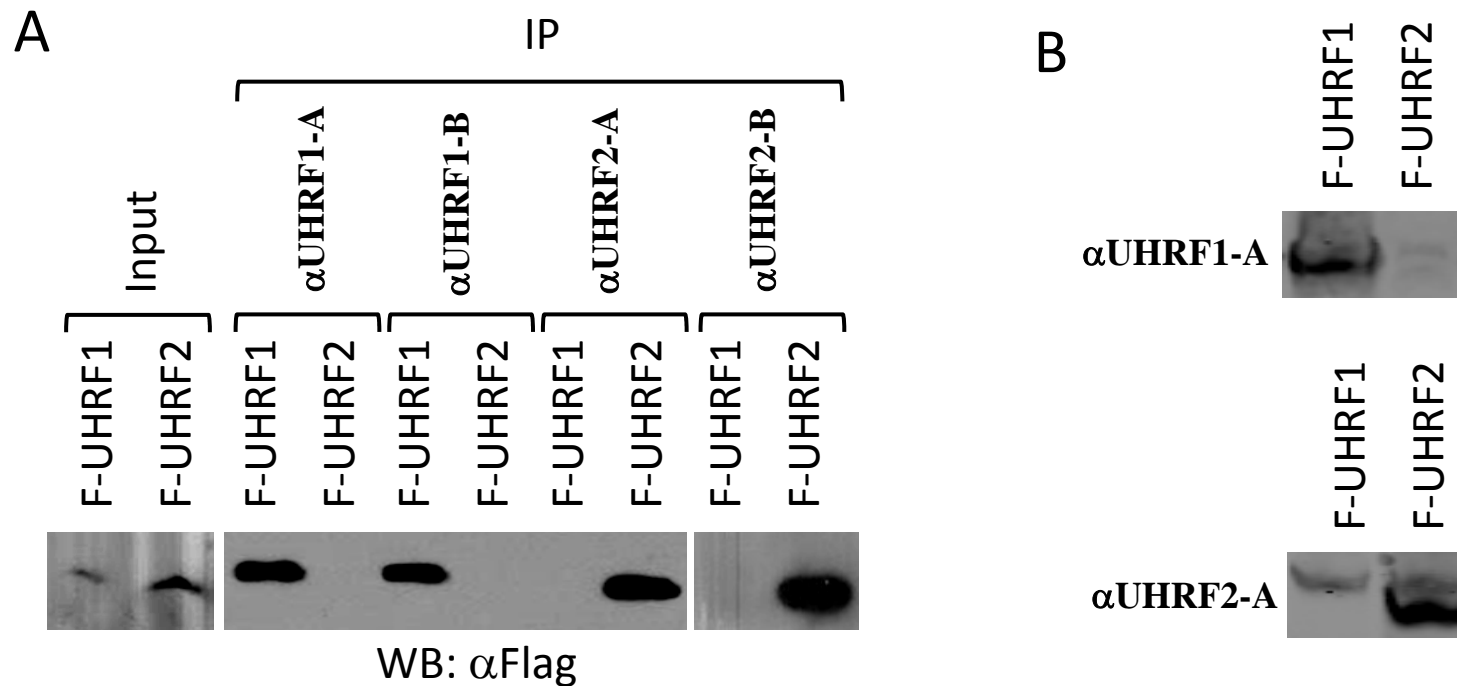

**Supplementary Fig. 2.** Characterization of antibodies against UHRF1 and UHRF2. **A)** IP-Western analysis showed that antibodies against UHRF1 and UHRF2 did not cross-react in IP. Cellular extracts were prepared from Flag-UHRF1 and Flag-UHRF2 transfected 293T cells respectively and subjected to IP with antibodies against UHRF1-A and B [raised against recombinant GST-UHRF1(aa386-650) and GST-UHRF1(aa85-610) respectively] and antibodies against UHRF2 [raised against GST-UHRF2(aa1-416) and GST-UHRF2(416-691) respectively]. Western analysis was carried out using anti-Flag antibody. **B)** The input in A) was analyzed by Western blot using anti-UHRF1-A and UHRF2-A antibody respectively.
