# Supplementary material
Source: PubMed Central journal article supplement (PMC3357991)
Supplement: cr2011176x3.pdf [file cr2011176x3.pdf]

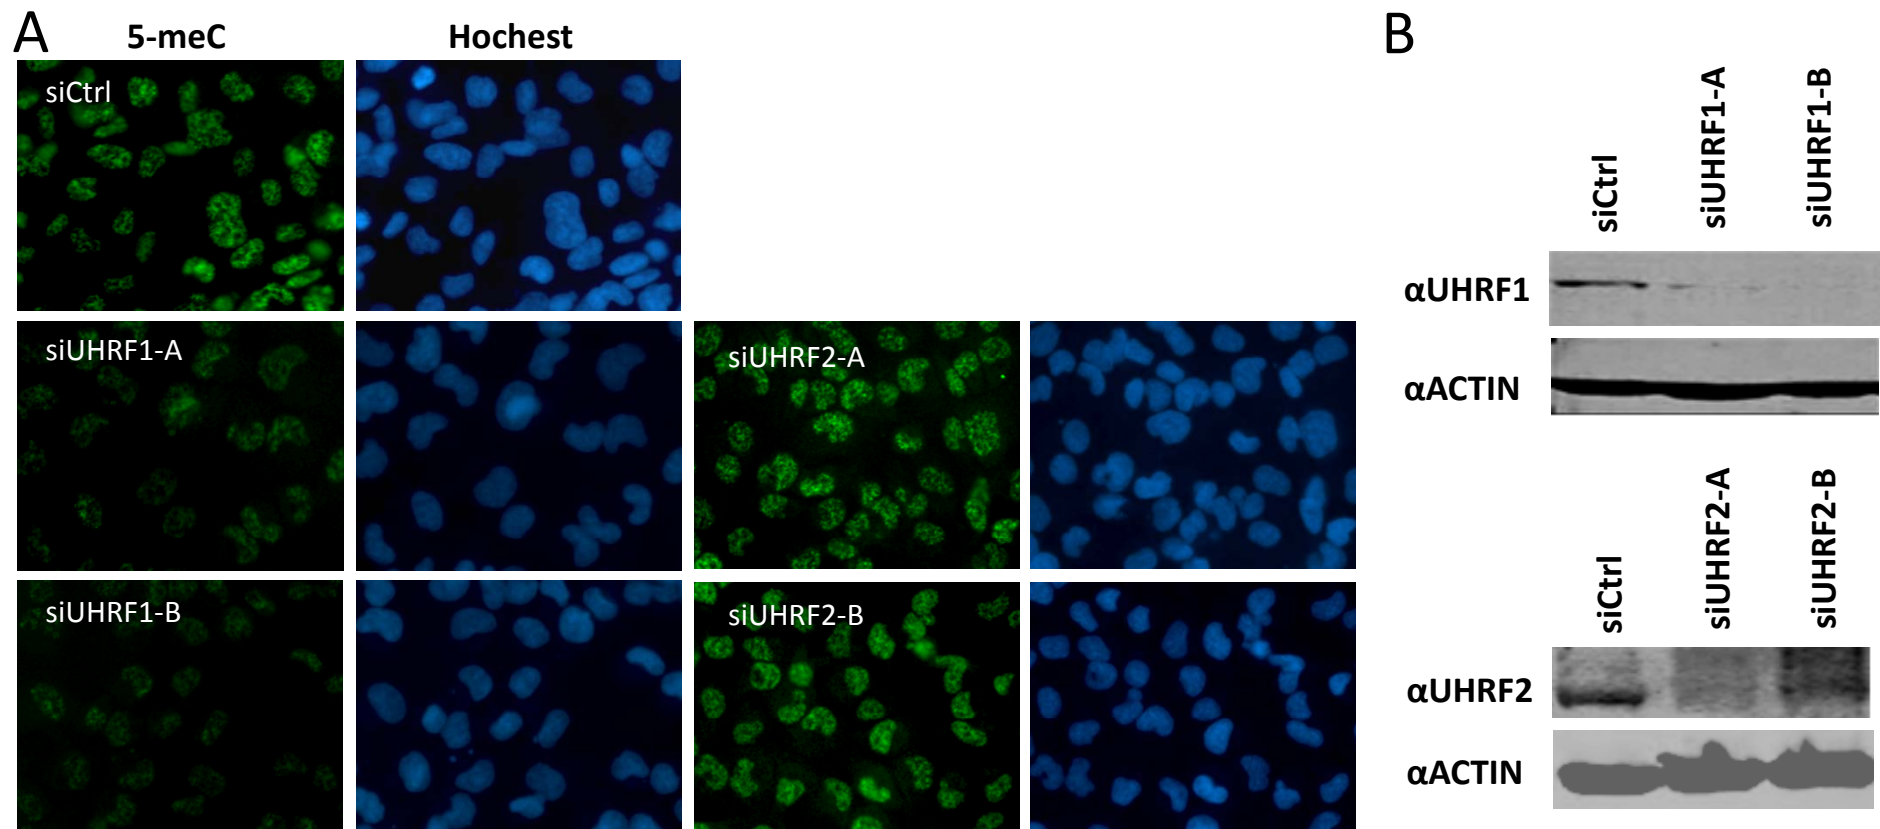

**Supplementary Fig. 3.** Knockdown of UHRF1 but not UHRF2 led to reduced levels of DNA methylation in HCT116 cells. A) HCT116 cells were treated with a control siRNA or two different siRNAs against UHRF1 or UHRF2. Three days after transfection, the cells were processed for immunostaining using an anti-methyl C antibody (5-meC). All pictures for 5-meC were taken under the same exposure. B) HCT116 cells treated with siRNAs as above were harvested for analysis of UHRF1 or UHRF2 protein levels by Western blot. Note that two siRNAs against UHRF1 or UHRF2 all reduced the levels of UHRF1 or UHRF2 by more than 60%. Also note that while knockdown of UHRF1 resulted in reduced levels of DNA methylation, knockdown of UHRF2 did not result in reduction in DNA methylation and may actually somewhat increase the levels of DNA methylation. Similar results were observed in other cell lines.
